# Supplementary material for: From Rice Husk Ash to Silica-Supported Carbon Nanomaterials: Characterization and Analytical Application for Pre-Concentration of Steroid Hormones from Environmental Waters
Source: MDPI journal article supplement (doi:10.3390/molecules28020745), 2023-01-11
Supplement: s1 [file s1]

## *Supplementary Material*

# **From Rice Husk Ash to Silica-supported Carbon Nanomaterials: Characterization and Analytical Application for Pre-concentration of Steroid Hormones from Environmental Waters**

**Petra Bianchini <sup>1</sup>, Francesca Merlo<sup>1</sup>, Federica Maraschi<sup>1</sup>, Rosaria Brescia<sup>2</sup>, Mirko Prato<sup>3</sup>, Antonella Profumo<sup>1</sup>, and Andrea Speltini<sup>1\*</sup>**

<sup>1</sup>*Department of Chemistry, University of Pavia, Via Taramelli 12, 27100 Pavia, Italy*

<sup>2</sup>*Electron Microscopy Facility, Istituto Italiano di Tecnologia, via Morego 30, 16163 Genova, Italy*

<sup>3</sup>*Materials Characterization Facility, Istituto Italiano di Tecnologia, via Morego 30, 16163 Genova, Italy*

*\*Correspondence: andrea.speltini@unipv.it; 0382 987350*

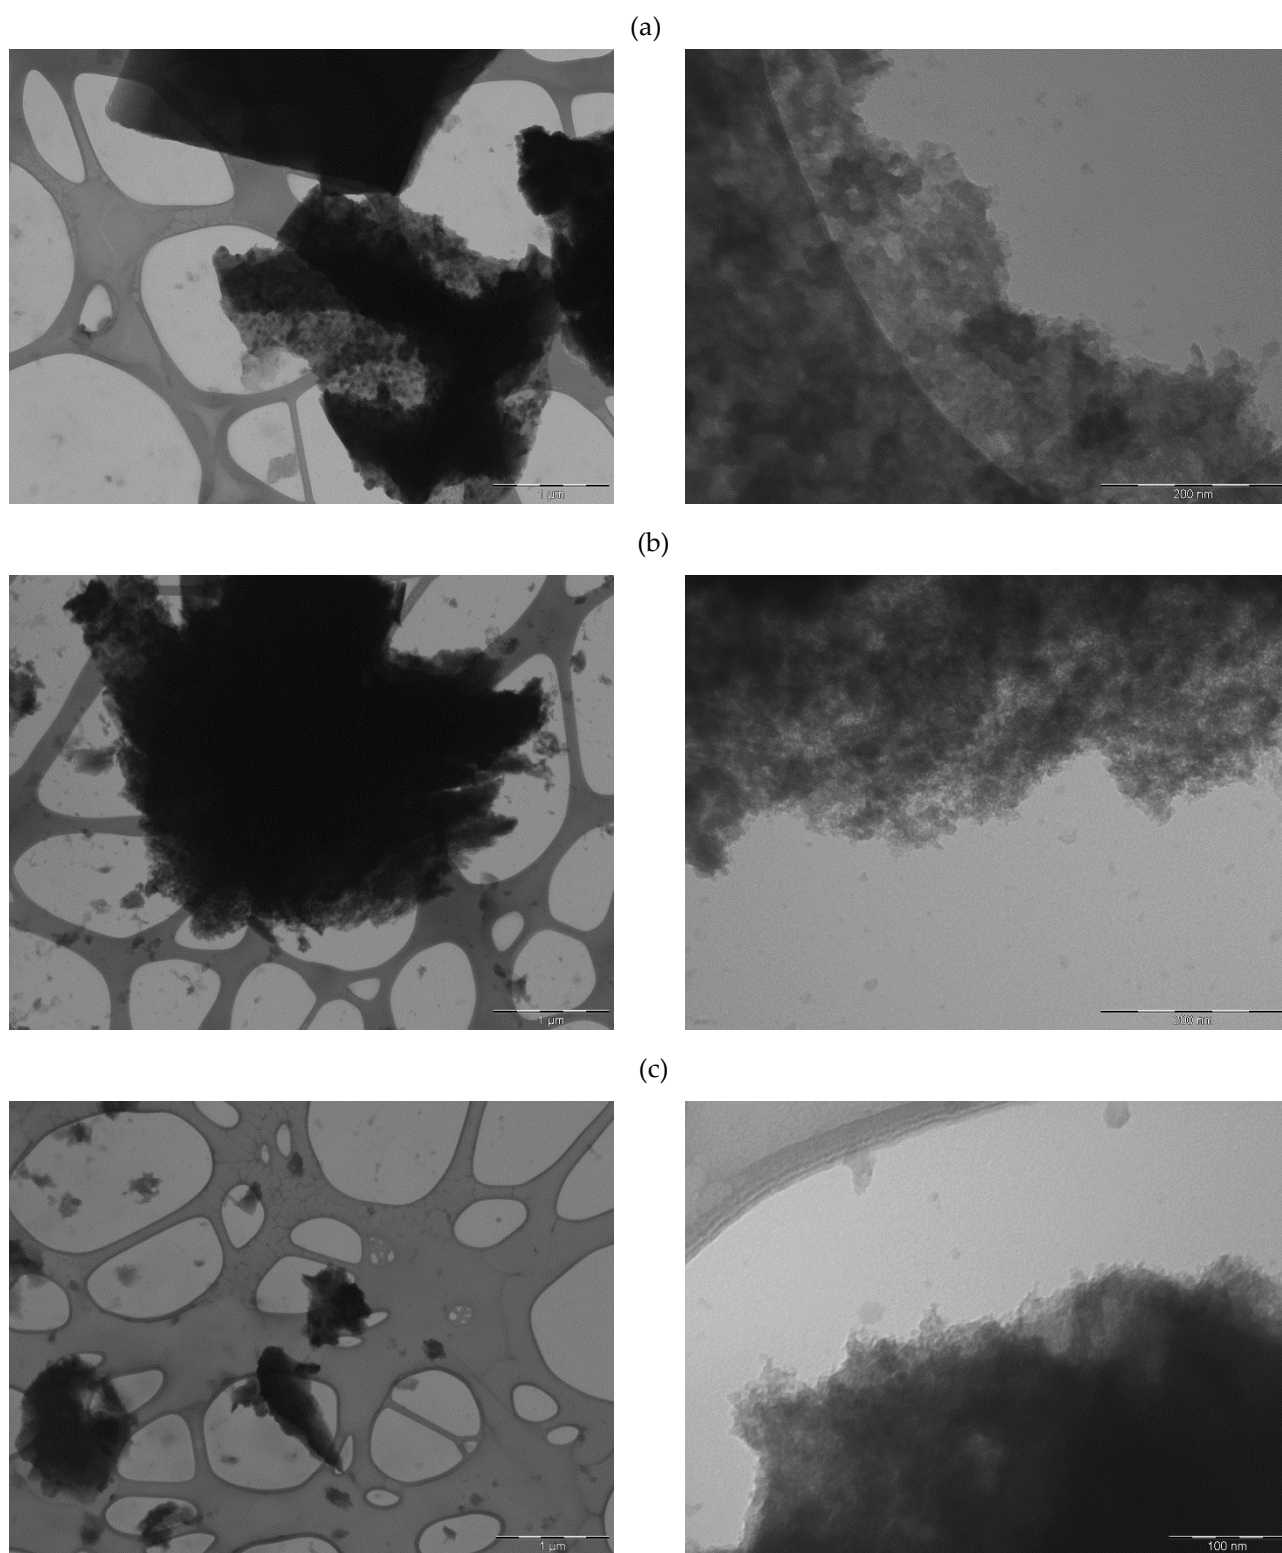

**Figure S1.** TEM images at different magnification (25,000, 200,000, and 250,000) of the material after oven treatment from pyrolyzed RH oxidized at different times: (a) 2 hours, (b) 4 hours, and (c) 8 hours.

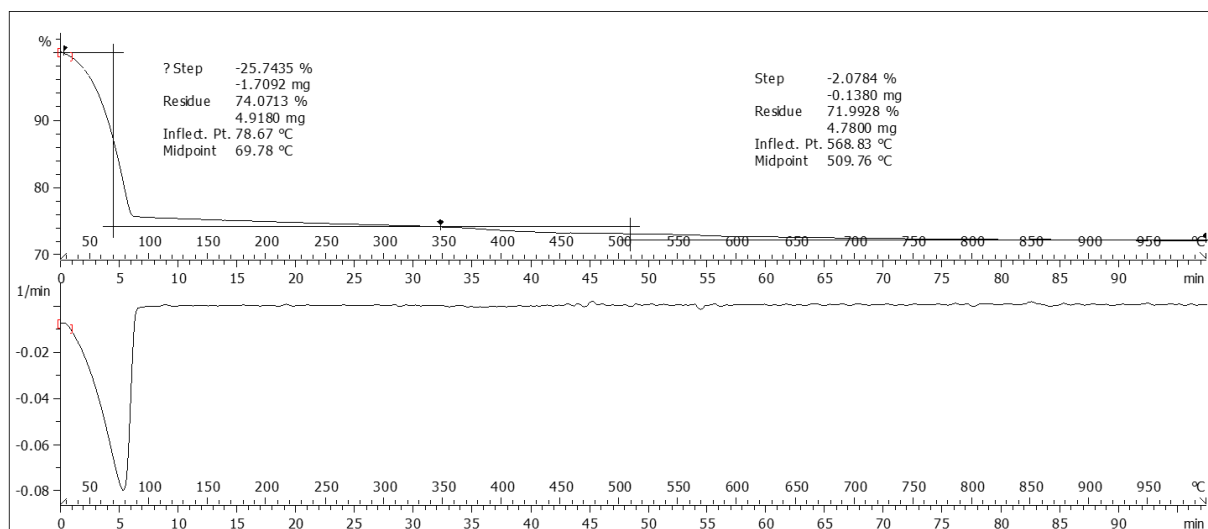

**Figure S2.** TGA profiles recorded on nC-RHA@SiO<sub>2</sub>.

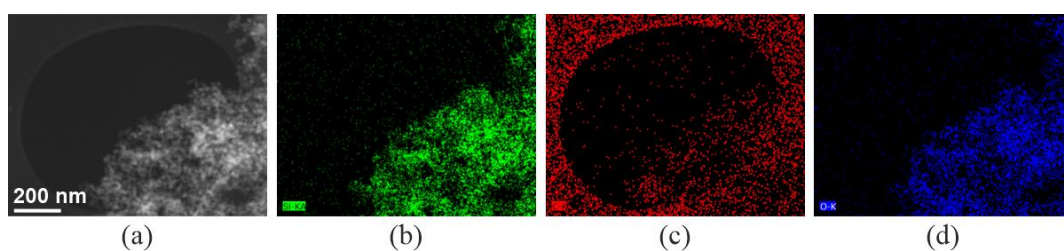

**Figure S3.** (a) HAADF-STEM image of a region in the sample CQD-RHA@SiO<sub>2</sub>, and corresponding STEM-EDS maps for Si (b), C (c) and O (d). For these regions, partly suspended on holes in the support carbon film, there is a clear co-localization of the three elements in the nanostructured material.

**Table 1.** STEM-EDS compositional analysis of (a) nC-RHA@SiO<sub>2</sub> and (b) CQD-RHA@SiO<sub>2</sub> suspended on holes in the carbon support film.

| a       |          |                 |                        |
|---------|----------|-----------------|------------------------|
| Element | Series   | Atom C. [at. %] | Rel. error (1 Sigma) % |
| C       | K series | 23.08           | 20.80                  |
| O       | K series | 47.64           | 5.33                   |
| Si      | K series | 29.28           | 3.18                   |
| Cu      | K series | 0.00            |                        |
| Ca      | K series | 0.00            |                        |
| Total   |          | 100.00          |                        |

| b       |          |                 |                        |
|---------|----------|-----------------|------------------------|
| Element | Series   | Atom C. [at. %] | Rel. error (1 Sigma) % |
| C       | K series | 49.64           | 5.77                   |
| O       | K series | 31.20           | 3.62                   |
| Si      | K series | 19.16           | 1.42                   |
| Cu      | K series | 0.00            |                        |
| Ca      | K series | 0.00            |                        |
|         | Total    | 100.00          |                        |

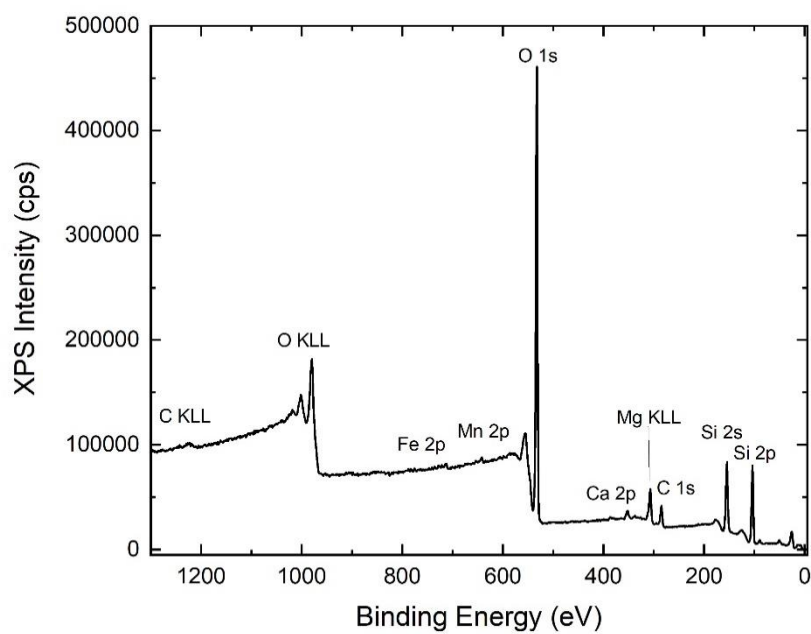

**Figure S4.** XPS survey spectrum acquired on nC-RHA@SiO<sub>2</sub>.

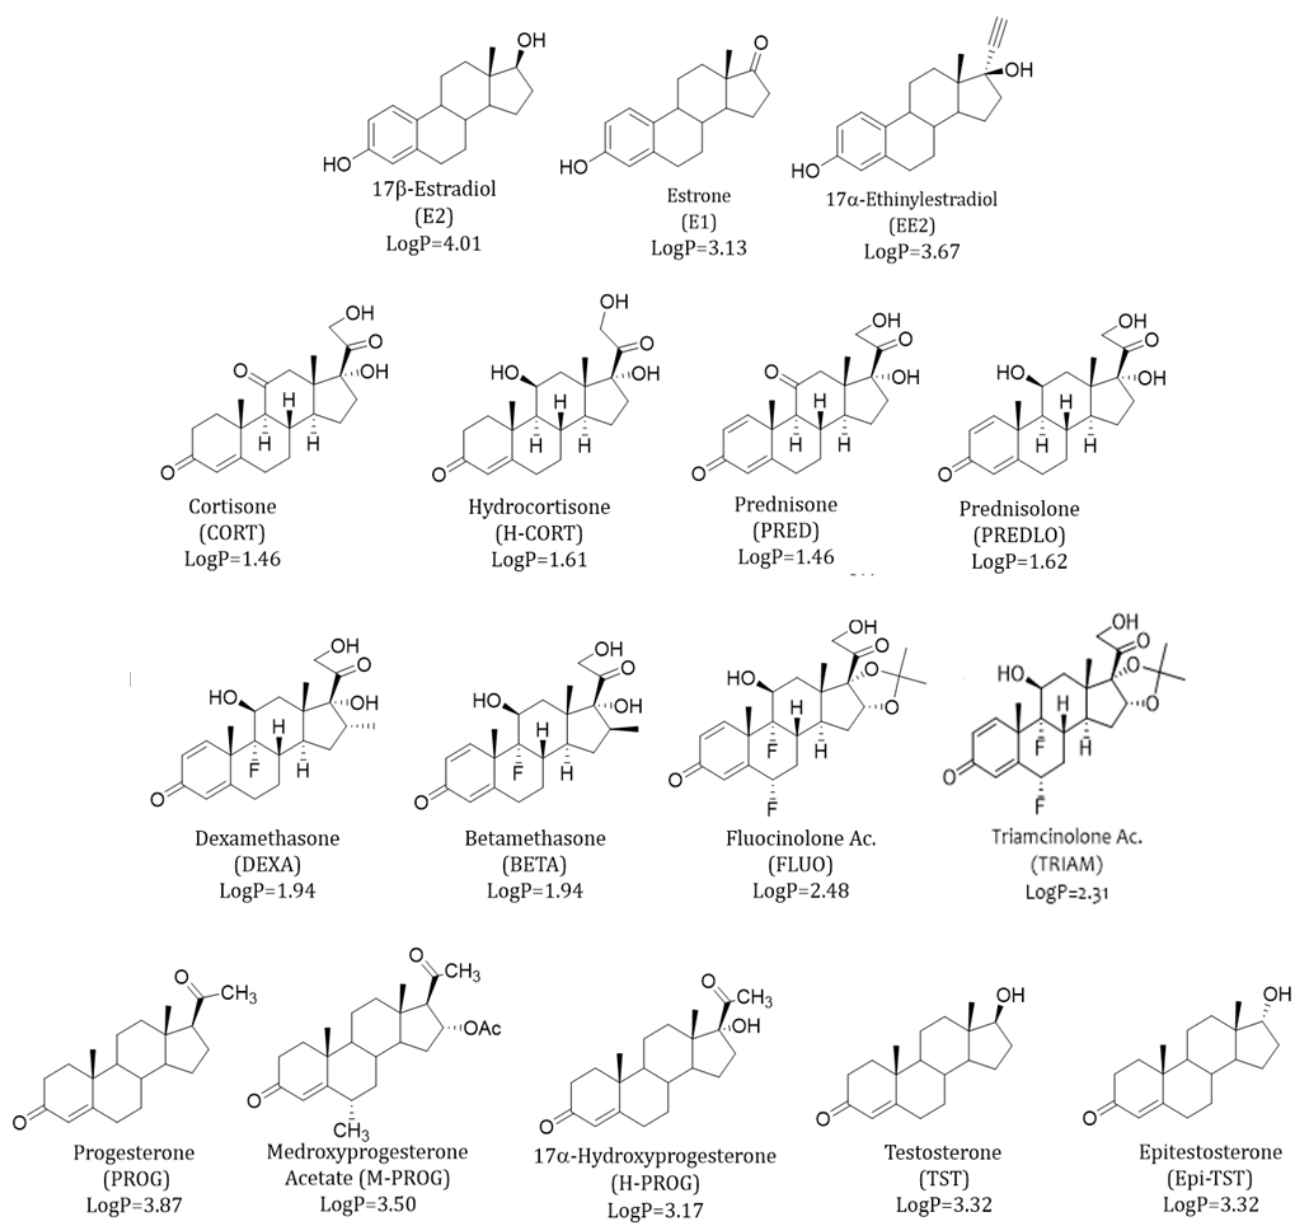

**Figure S5.** Molecular structures and LogP values of the target analytes.

**Table S2.** MRM conditions for the HPLC-ESI-MS/MS analysis of SHs.

| Analyte | Precursor Ion (m/z)* | Product Ion (m/z) | Dwell Time (ms) | Fragmentor energy (V) | Collision energy (V) | Polarity |
|---------|----------------------|-------------------|-----------------|-----------------------|----------------------|----------|
| EE2     | 295                  | 145.1             | 50              | 154                   | 44                   | Negative |
|         |                      | 143.1             | 50              | 154                   | 68                   |          |
| E2      | 271                  | 183.3             | 100             | 166                   | 50                   | Negative |
|         |                      | 143.1             | 100             | 166                   | 64                   |          |
| E1      | 269                  | 145.1             | 15              | 148                   | 55                   | Negative |
|         |                      | 143.1             | 15              | 148                   | 60                   |          |
| BETA    | 373                  | 355.3             | 15              | 82                    | 8                    | Positive |
|         |                      | 147.1             | 15              | 82                    | 24                   |          |
| CORT    | 361                  | 163.2             | 15              | 130                   | 20                   | Positive |
|         |                      | 105               | 15              | 130                   | 48                   |          |
| DEXA    | 373                  | 355.4             | 15              | 76                    | 4                    | Positive |
|         |                      | 91                | 15              | 76                    | 80                   |          |
| FLUO    | 495                  | 475.3             | 15              | 88                    | 0                    | Positive |
|         |                      | 337.3             | 15              | 88                    | 8                    |          |
| H-CORT  | 363                  | 121               | 15              | 124                   | 20                   | Positive |
|         |                      | 91                | 15              | 124                   | 68                   |          |
| PRED    | 359                  | 341.3             | 15              | 76                    | 4                    | Positive |
|         |                      | 147.1             | 15              | 76                    | 24                   |          |
| PREDLO  | 343                  | 147.1             | 15              | 112                   | 20                   | Positive |
|         |                      | 91                | 15              | 112                   | 72                   |          |
| TRIAM   | 415                  | 397.3             | 15              | 130                   | 8                    | Positive |
|         |                      | 91                | 15              | 130                   | 80                   |          |
| EpiTST  | 253                  | 109               | 15              | 100                   | 25                   | Positive |
|         |                      | 97                | 15              | 100                   | 20                   |          |
| TST     | 289                  | 109               | 15              | 76                    | 24                   | Positive |
|         |                      | 97.1              | 15              | 76                    | 20                   |          |
| H-PROG  | 331                  | 109.1             | 15              | 118                   | 28                   | Positive |
|         |                      | 97.1              | 15              | 118                   | 24                   |          |
| PROG    | 315                  | 109               | 15              | 94                    | 24                   | Positive |
|         |                      | 97                | 15              | 94                    | 20                   |          |
| M-PROG  | 387                  | 327.4             | 15              | 106                   | 8                    | Positive |
|         |                      | 123.1             | 15              | 106                   | 24                   |          |

\*[M-H]<sup>-</sup> adduct for negative ion and [M+H]<sup>+</sup> adduct for positive ion.

**Table S3.** Physicochemical parameters of the water samples.

|                               | Tap<br>Water | Lake<br>water | River<br>water | UWWTP<br>effluent | Garda<br>Lake<br>water | Ticino<br>River<br>water | Vigevano<br>UWWTP<br>effluent |
|-------------------------------|--------------|---------------|----------------|-------------------|------------------------|--------------------------|-------------------------------|
| pH                            | 7.7          | 7.81          | 7.2            | 7.6               | 7.14                   | 7.4                      | 7.3                           |
| X 20 °C                       | 270          | 59            | 344            | 164               | 278                    | 178                      | 294                           |
| HCO <sub>3</sub> <sup>-</sup> | -            | -             | 176            | 70                | -                      | 86                       | 65                            |
| Cl <sup>-</sup>               | 5.0          | 2.2           | 11.3           | 5.5               | 13.3                   | 5.3                      | 31.0                          |
| NO <sub>3</sub> <sup>-</sup>  | 0.6          | 3.0           | 6.7            | 4.2               | 9.0                    | 3.8                      | 35.0                          |
| SO <sub>4</sub> <sup>2-</sup> | 5            | 6.0           | 33.6           | 24.5              | 14.3                   | 23.9                     | 23.0                          |
| Ca                            | 36.1         | 7.0           | 52.5           | 23.5              | 39                     | 27.3                     | 23.0                          |
| Mg                            | 8.1          | 1.6           | 13.5           | 5.6               | 7.2                    | 6.0                      | 5.6                           |
| Sr                            | -            | -             | 0.20           | 0.20              | -                      | 0.20                     | 0.10                          |
| Na                            | 12.5         | 2.7           | 10.0           | 5.7               | 9.5                    | 5.1                      | 26.5                          |
| K                             | -            | -             | 2.6            | 1.4               | -                      | 1.4                      | 5.3                           |
| SiO <sub>2</sub>              | -            | -             | 15.5           | 2.0               | -                      | 3.6                      | 15.0                          |

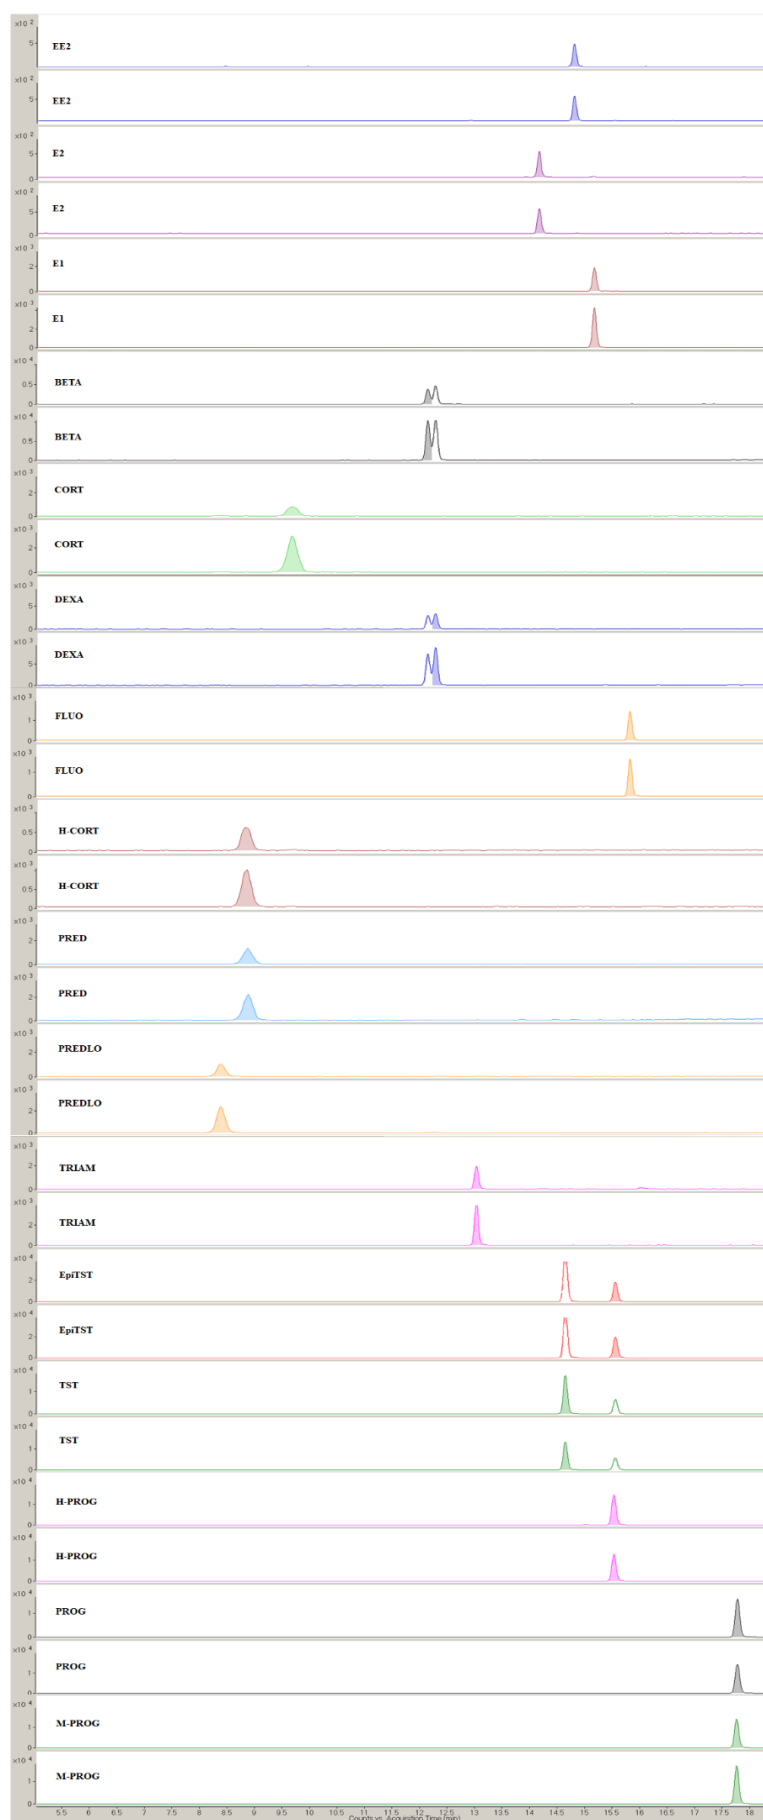

**Figure S6.** Typical MRM chromatogram of a SHs standard solution ( $10 \mu\text{g L}^{-1}$  of each analyte) prepared in methanol.
